# Supplementary material for: Dynamic single crystal to polycrystal transformation of a 1D-coordination polymer and its second harmonic generation
Source: Royal Society of Chemistry journal article supplement (doi:10.1039/c5dt04283f), 2015-12-10
Supplement: c5dt04283f1.pdf [file c5dt04283f1.pdf]

# ESI for the article: Dynamic Single Crystal to Polycrystal Transformation of a 1D-Coordination Polymer and its Second Harmonic Generation.

Massimo Cametti<sup>a</sup> Ilaria Bargigia<sup>b</sup> and Javier Martí-Rujas<sup>\*b</sup>

## Contents

### Experimental Methods

#### 1. Synthesis of ligand L.

**Figure S1.** Scheme of the synthesis of L.

#### <sup>1</sup>H-NMR and <sup>13</sup>C-NMR Characterization of L

**Figure S2.** <sup>1</sup>H-NMR spectrum of L.

**Figure S3.** <sup>13</sup>C-NMR spectrum of L.

**Figure S4.** IR spectrum of L.

**Figure S5.** IR spectrum of 1.

### ESI-MS

#### Single Crystal X-ray characterization of L

**Table S1.** Crystallographic data of L.

**Figure S6.** Crystal structure of L showing the weak intermolecular interactions hydrogen bond interactions between the C-H...N interactions.

**Figure S7.** XRPD pattern of 1·CHCl<sub>3</sub> simulated from single crystal X-ray diffraction (100 K) (a); and experimental XRPD obtained by leaving single crystals of 1·CHCl<sub>3</sub> in contact with air for 30 mins. (300 K) (b).

**Figure S8.** Ab initio crystal structure of 1 showing the V-shape geometry of the 1D coordination polymer chain.

**Figure S9.** (a) Simulated XRPD pattern of 1 (300 K); (b) experimental XRPD pattern of 1 obtained after fast precipitation of a solution of L (CHCl<sub>3</sub>) and a solution of ZnI<sub>2</sub> (MeOH).

**Figure S10.** *In situ* high temperature experiments in which 1 was heated from RT to 450 °C. The heating rate was in two ramps: The first heating ramp from RT to 250 °C was a fast heating rate of 10 °C/min in which no phase transition was detected (*i.e.*, only thermal expansion). Once the sample reached 250 °C the heating rate was decreased to 4 °C/min. Clearly, 1 diffracts up to 360 °C

and it becomes amorphous after that. The thermal stability of **1** is quite good for a 1D coordination polymer. Synchrotron radiation: Wavelength: 0.61996808Å.

**Figure S11.** (a) XRPD pattern obtained after instant synthesis of **L** and ZnBr<sub>2</sub> in CHCl<sub>3</sub>; (b) experimental XRPD pattern of **1** obtained after the instant synthesis of **L** and ZnI<sub>2</sub>.

**Figure S12.** (a) XRPD pattern obtained after instant synthesis of **L** and ZnBr<sub>2</sub> in CHCl<sub>3</sub>; experimental XRPD pattern of **1** obtained after the instant synthesis of **L** and ZnCl<sub>2</sub> (a).

### **SHG Experiments Set Up**

## **Experimental Methods**

All reagents were used as purchased, without further purification.

The  $^1\text{H}$  NMR and  $^{13}\text{C}$  NMR experiments were carried out using a Bruker Avance 400 MHz instrument.

The IR experiments were carried out using a Varian 640 equipped with a ATR module.

Then Elemental Analyses experiments were carried out using a Costech ECS mod. 4010.

ESI-MS data was measured using a Esquire 3000+ spectrometer working in continuous flow electrospray ionization method.

Single crystal X-ray diffraction experiments were carried out using a Bruker X8 Prospector diffractometer.

The powder X-ray diffraction data of **1** was recorded at ambient temperature in transmission mode on a Bruker D8 diffractometer.

## 1. Synthesis of ligand L.

L was synthesized by adding 160 mg of 4-(4-formyl-phenyl) pyridine (0.87 mmol) and 50 mg of 1,4-diaminocyclohexane (0.44 mmol) in 10 mL of MeCN (Figure S1). The solution was maintained under refluxing conditions for 4h and then left under stirring at r.t. overnight. The product, in the form of a white precipitate, is filtered off and washed with diethylether. Yield = 85%.

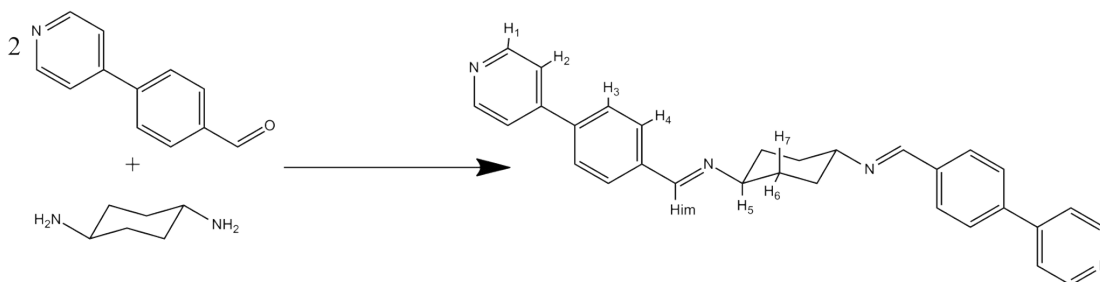

Figure S1. Scheme of the synthesis of L.

## <sup>1</sup>H-NMR and <sup>13</sup>C-NMR Characterization of L

<sup>1</sup>H NMR (400 MHz, CDCl<sub>3</sub>): δ 8.68 (dd, *J* = 4.5, 1.6 Hz, 4H), 8.44 (s, 2H), 7.87 (d, *J* = 8.3 Hz, 4H), 7.70 (d, *J* = 8.3 Hz, 4H), 7.54 (dd, *J* = 4.5, 1.6 Hz, 4H), 3.34 (s, broad, 2H), 1.89 (m, 8H)

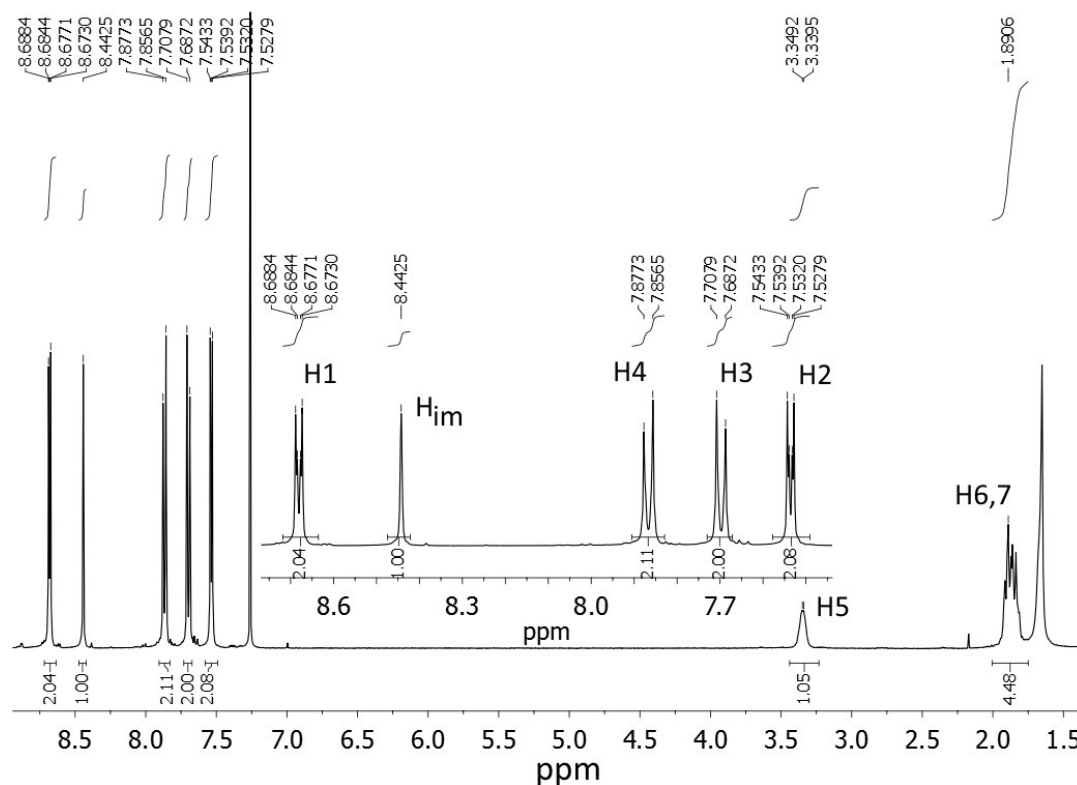

Figure S2. <sup>1</sup>H-NMR spectrum of L.

$^{13}\text{C}$  NMR (101 MHz,  $\text{CDCl}_3$ )  $\delta$  158.82, 150.49, 147.75, 140.18, 137.18, 128.96, 127.38, 121.73, 69.53, 32.69.

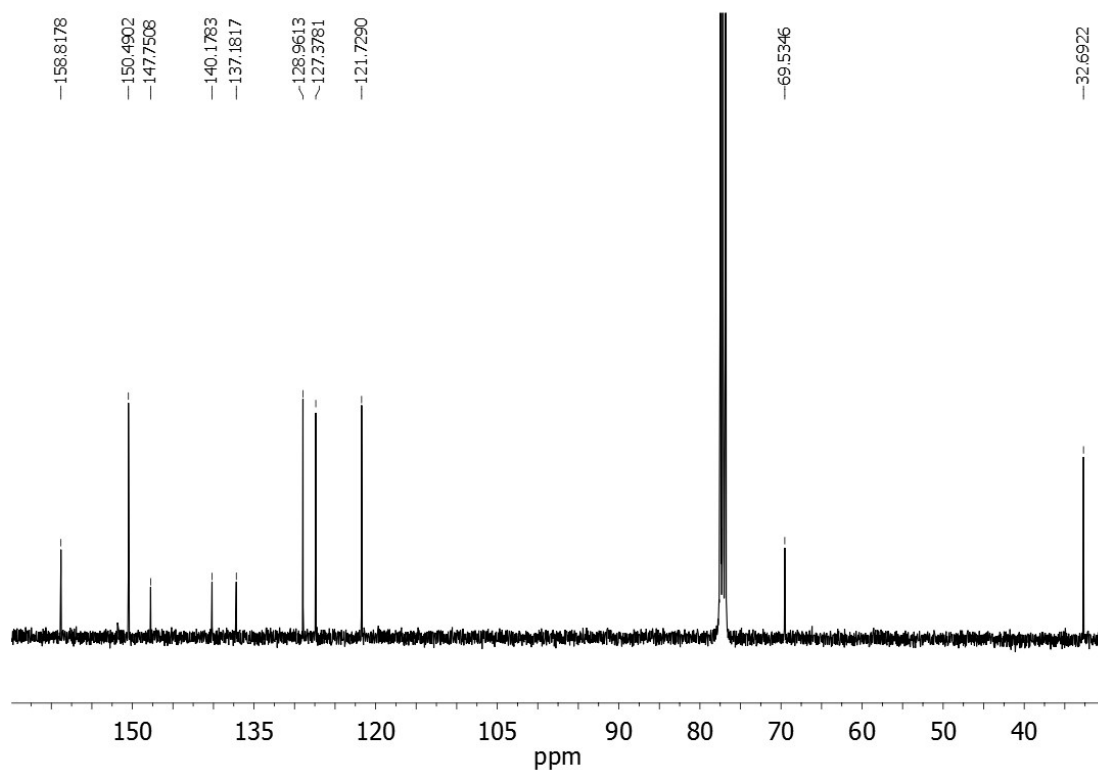

Figure S3.  $^{13}\text{C}$ -NMR spectrum of L.

## IR Experiments

Agilent Resolutions Pro

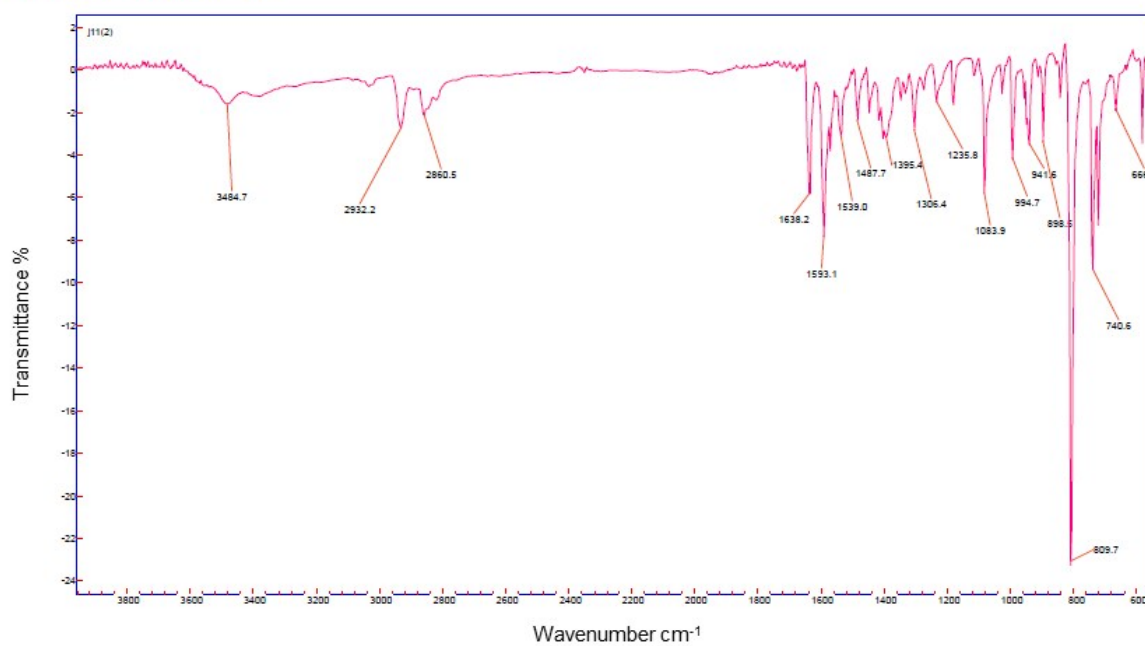

Figure S4. ATR-FTIR spectrum of L.

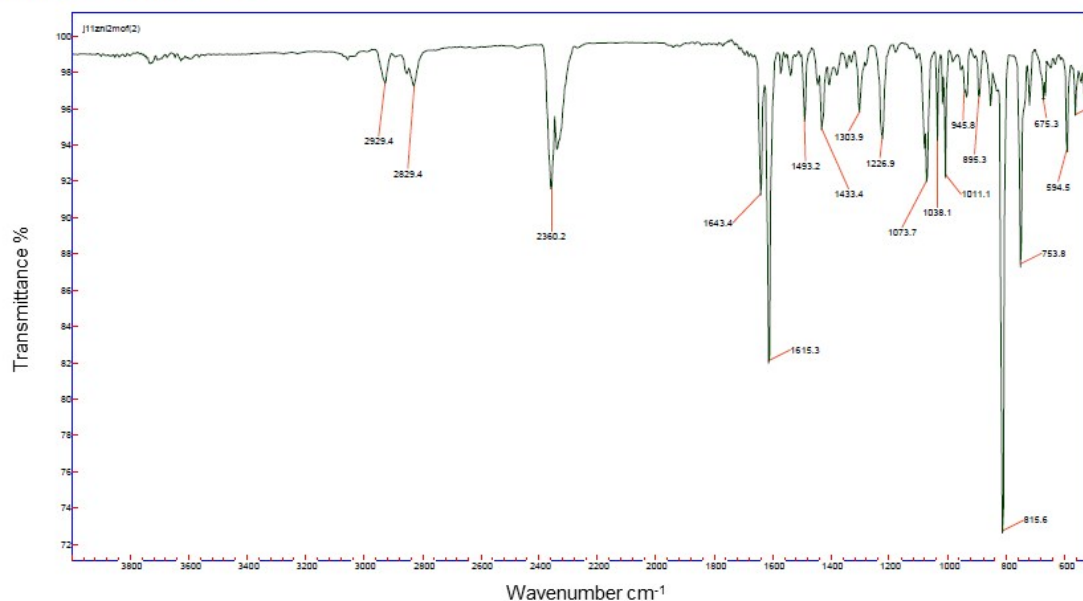

**Figure S5.** ATR-FTIR spectrum of **1**.

### ESI-MS

ESI-MS:  $[M]^+$  = 444.23 calcd. for  $C_{30}H_{28}N_4$ , found 445.33  $[M+H]^+$

### Single Crystal X-ray characterization of **L**

The single crystals of **L** were obtained by evaporating a  $CHCl_3$  solution (5 mL) of **L** (20 mg) at room temperature. **L** crystal structure was determined by single crystal X-ray diffraction.

**Table S1.** Crystallographic data of **L**.

|                         |                               |                           |
|-------------------------|-------------------------------|---------------------------|
| <b>Crystal data for</b> | <b>L</b>                      |                           |
| Empirical formula       | $C_{30} H_{28} N_4$           |                           |
| Formula weight          | 360.3210 g/mol                |                           |
| Temperature             | 296(2)                        |                           |
| Crystal system          | Monoclinic                    |                           |
| Space group             | $P2_1/n$                      |                           |
| Unit cell dimensions    | $a = 10.4467(11) \text{ \AA}$ | $\alpha = 90.00^\circ$    |
|                         | $b = 16.6677(17) \text{ \AA}$ | $\beta = 99.288(7)^\circ$ |
|                         | $c = 14.0230(12) \text{ \AA}$ | $\gamma = 90.00^\circ$    |
| Volume                  | 2409.71(4) $\text{\AA}^3$     |                           |
| Z                       | 4                             |                           |
| R- Factor (%)           | 5.58                          |                           |
| Density (calculated)    | 1.225 g/cm <sup>3</sup>       |                           |

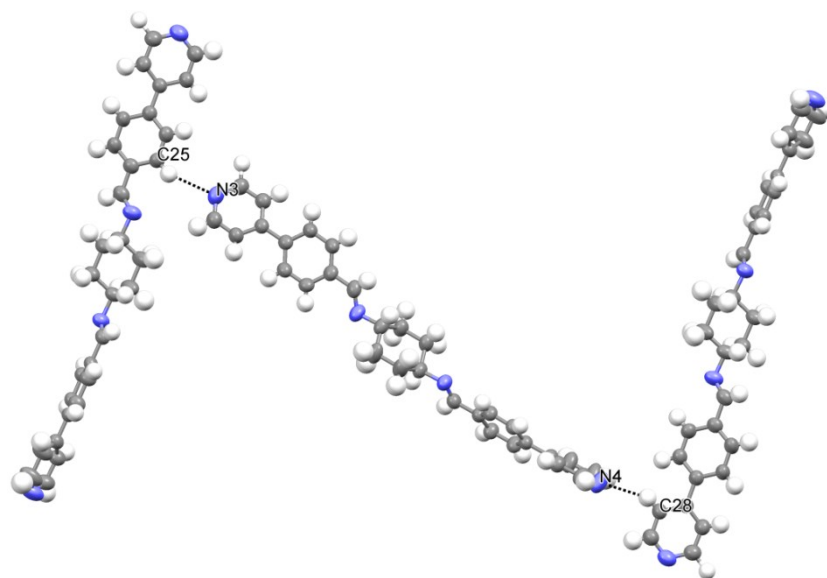

**Figure S6.** Crystal structure of **L** showing the weak intermolecular interactions hydrogen bond interactions between the C-H $\cdots$ N interactions.

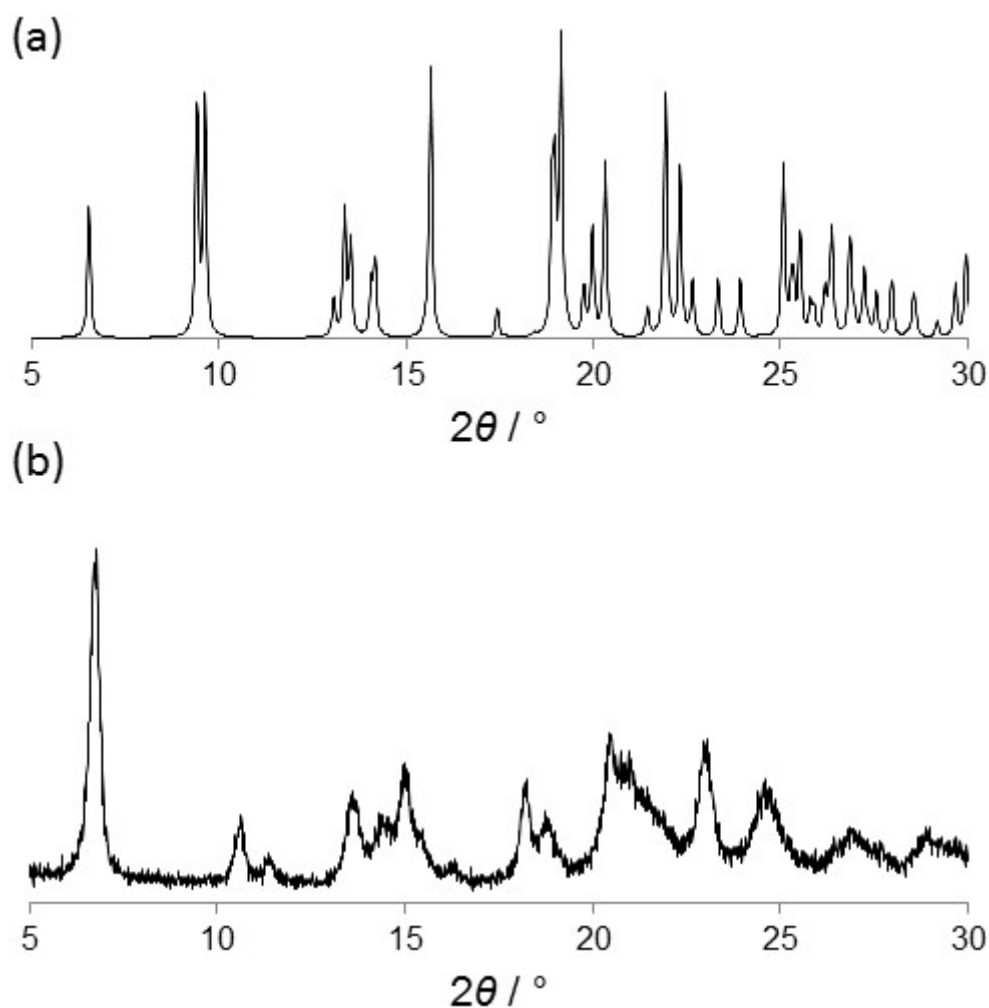

**Figure S7.** XRPD pattern of  $1 \cdot \text{CHCl}_3$  simulated from single crystal X-ray diffraction (100 K) (a); and experimental XRPD obtained by leaving single crystals of  $1 \cdot \text{CHCl}_3$  in contact with air for 30 mins. (300 K) (b).

#### **Ab initio XRPD structure solution of 1.**

The powder X-ray diffraction data of **1** were recorded at ambient temperature in transmission mode on a Bruker D8 diffractometer [ $\text{CuK}_{\alpha 1}$ , Ge monochromated, linear position-sensitive detector covering  $12^\circ$  in  $2\theta$ ;  $2\theta$  range,  $5^\circ$  -  $70^\circ$ ; step size,  $0.017^\circ$ ; data collection time, 12 h. The sample was covered using transparent foil]. The XRPD data was used to carry out the crystal structure determination using DASH program.



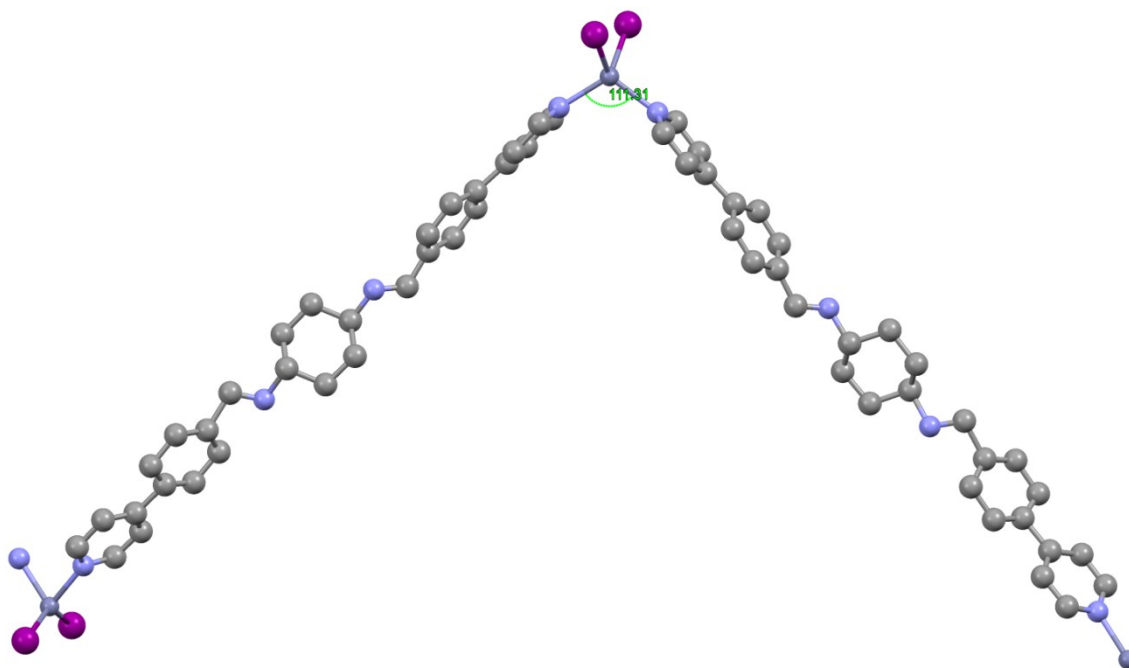

**Figure S8.** Ab initio crystal structure of **1** showing the V-shape geometry of the 1D coordination polymer chain.

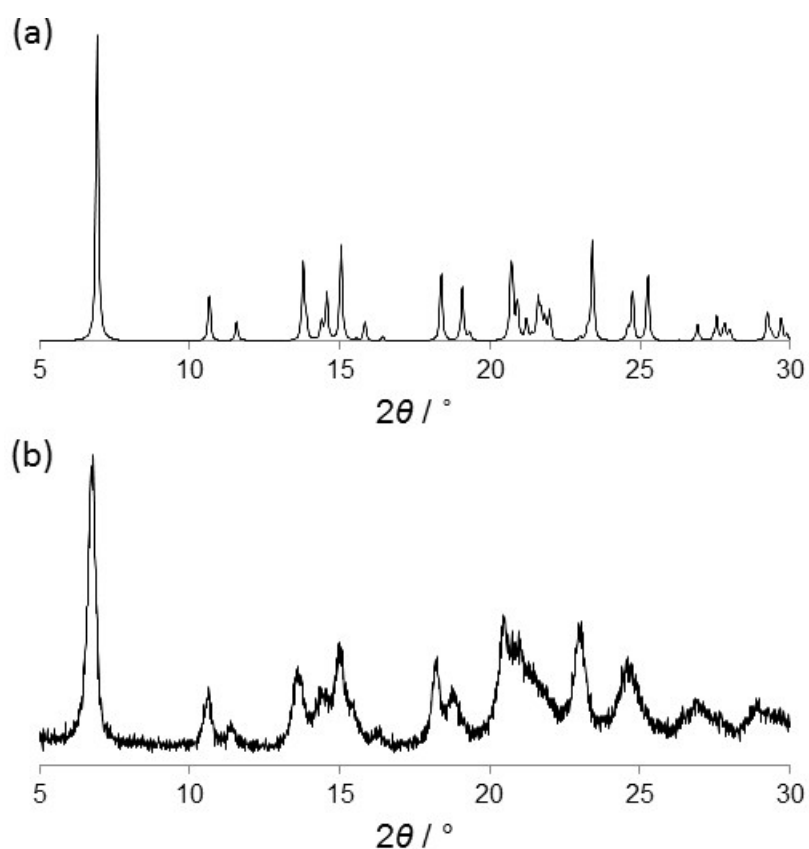

**Figure S9.** (a) Simulated XRPD pattern of **1** (300 K); (b) experimental XRPD pattern of **1** obtained after fast precipitation of a solution of **L** ( $\text{CHCl}_3$ ) and a solution of  $\text{ZnI}_2$  (MeOH).

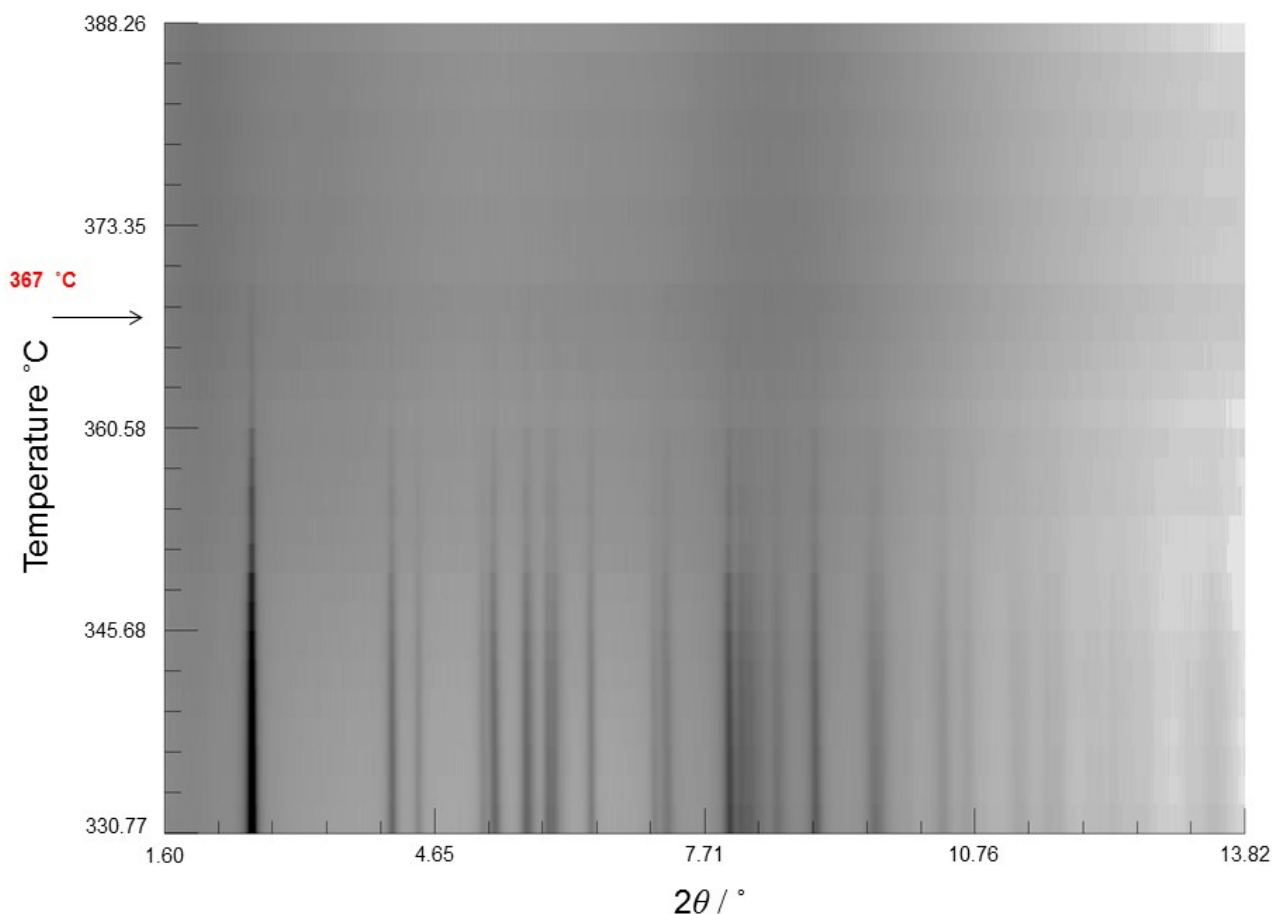

**Figure S10.** *In situ* high temperature experiments in which **1** was heated from RT to 450 °C. The heating rate was in two ramps: The first heating ramp from RT to 250 °C was a fast heating rate of 10 °C/min in which no phase transition was detected (*i.e.*, only thermal expansion). Once the sample reached 250 °C the heating rate was decreased to 4 °C/min. Clearly, **1** diffracts up to 360 °C and it becomes amorphous after that. The thermal stability of **1** is quite good for a 1D coordination polymer. Synchrotron radiation: Wavelength: 0.61996808Å.

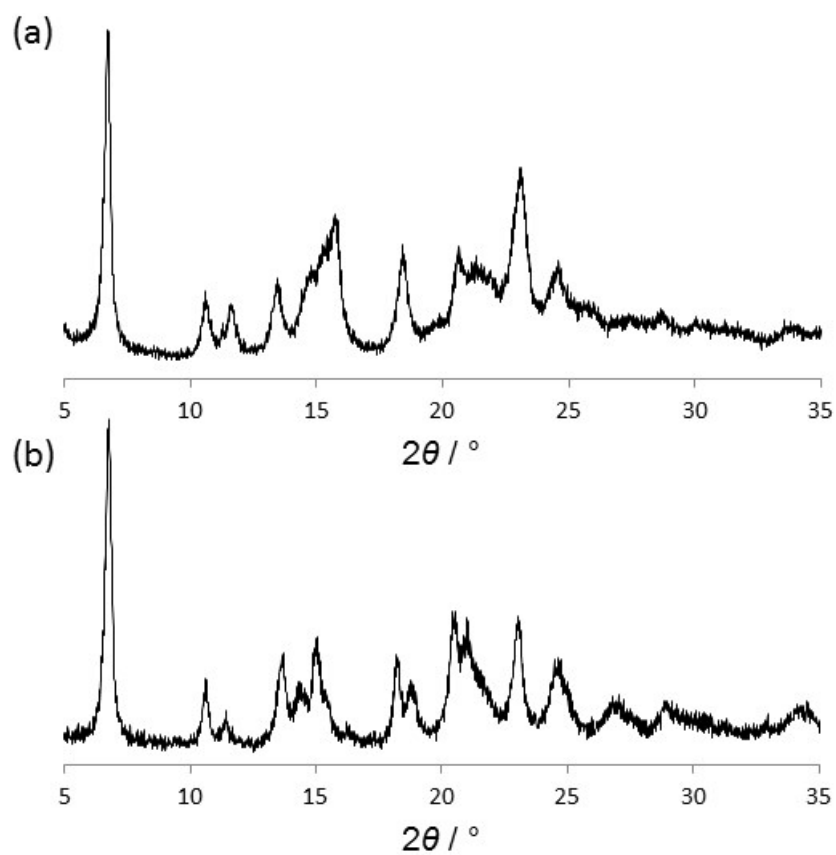

**Figure S11.** (a) XRPD pattern obtained after instant synthesis of **L** and  $\text{ZnBr}_2$  in  $\text{CHCl}_3$ ; (b) experimental XRPD pattern of **1** obtained after the instant synthesis of **L** and  $\text{ZnI}_2$ .

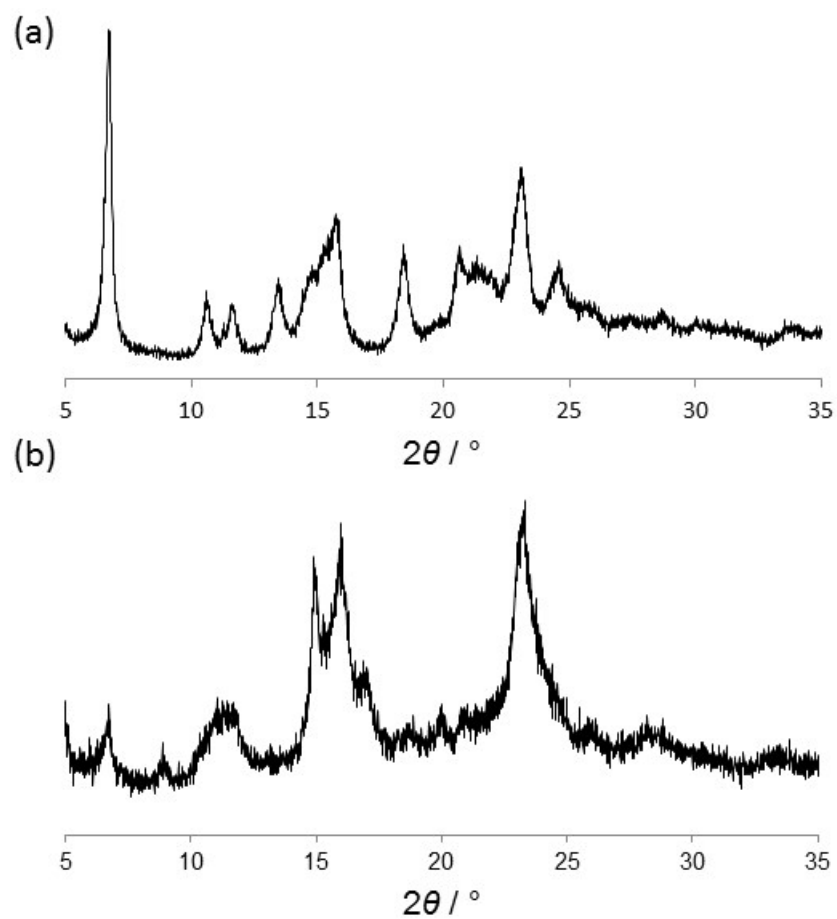

**Figure S12.** (a) XRPD pattern obtained after instant synthesis of **L** and  $\text{ZnBr}_2$  in  $\text{CHCl}_3$ ; experimental XRPD pattern of **1** obtained after the instant synthesis of **L** and  $\text{ZnCl}_2$  (a).

## SHG Experiments Set Up

The laser source is a Ti:Sapph laser emitting 150 fs pulses at a repetition rate of 80 MHz. The sample was excited thanks to a home-built microscope working in reflectance geometry; the excitation wavelength was 800 nm. For these measurements the microscope was equipped with a dichroic mirror 750 nm short pass and an objective providing 20× magnification. The signal coming from the sample was cleaned from the pump wavelength thanks to a BG39 coloured filter and then sent to a spectrometer. The thus dispersed light was collected thanks to a Streak Camera (Hamamatsu) detector, used for its high sensitivity.

### MEASUREMENTS

Meas. 1: Crystal 1 inside, then it blasted. Measurement parameters:

- Detector gain 36, 1000 exposures each of which lasts around 35ms

Meas. 2: outside the crystal, just on oil. Measurement parameters:

- Detector gain 54, 1000 exposures each of which lasts around 35ms

Meas. 3: inside a crystal of urea, lower excitation power was used. Measurement parameters:

- Detector gain 36, 1000 exposures each of which lasts around 35ms

Meas. 4: inside the same crystal of urea, same power used for Meas.1 and 2 but the collected signal was attenuated with a 1 OD filter so to use the same gain as for Meas.1

- Detector gain 36, 1000 exposures each of which lasts around 35ms, 1OD filter

# checkCIF (basic structural check) running

---

## checkCIF/PLATON (basic structural check)

---

Structure factors have been supplied for datablock(s) j11

THIS REPORT IS FOR GUIDANCE ONLY. IF USED AS PART OF A REVIEW PROCEDURE FOR PUBLICATION, IT SHOULD NOT REPLACE THE EXPERTISE OF AN EXPERIENCED CRYSTALLOGRAPHIC REFEREE.

No syntax errors found.

Please wait while processing ....

[Structure factor report](#)

[CIF dictionary](#)

[Interpreting this report](#)

## Datablock: j11

---

Bond precision: C-C = 0.0033 Å Wavelength=1.54178

Cell: a=10.4431 (6) b=16.6727 (9) c=14.0282 (8)

alpha=90 beta=99.453 (4) gamma=90

Temperature: 296 K

|                                     | Calculated   | Reported     |
|-------------------------------------|--------------|--------------|
| Volume                              | 2409.4 (2)   | 2409.3 (2)   |
| Space group                         | P 21/n       | P21/n        |
| Hall group                          | -P 2yn       | ?            |
| Moiety formula                      | C30 H28 N4   | ?            |
| Sum formula                         | C30 H28 N4   | C30 H28 N4   |
| Mr                                  | 444.56       | 445.57       |
| D <sub>x</sub> , g cm <sup>-3</sup> | 1.226        | 1.228        |
| Z                                   | 4            | 4            |
| Mu (mm <sup>-1</sup> )              | 0.566        | 0.566        |
| F000                                | 944.0        | 948.0        |
| F000'                               | 946.48       |              |
| h, k, l <sub>max</sub>              | 12, 19, 16   | 12, 19, 16   |
| N <sub>ref</sub>                    | 4343         | 4216         |
| T <sub>min</sub> , T <sub>max</sub> | 0.934, 0.945 | 0.920, 0.946 |

Tmin' 0.919

Correction method= # Reported T Limits: Tmin=0.920  
Tmax=0.946 AbsCorr = MULTI-SCAN

Data completeness= 0.971 Theta(max)= 67.510

R(reflections)= 0.0501( 2781) wR2(reflections)= 0.1643( 4216)

S = 1.044 Npar= 307

---

The following ALERTS were generated. Each ALERT has the format

**test-name\_ALERT\_alert-type\_alert-level.**

Click on the hyperlinks for more details of the test.

---

### ● Alert level C

[ABSTY02\\_ALERT\\_1\\_C](#) An \_exptl\_absorpt\_correction\_type has been given without a literature citation. This should be contained in the \_exptl\_absorpt\_process\_details field.  
Absorption correction given as Multi-scan

[PLAT029\\_ALERT\\_3\\_C](#) \_diffn\_measured\_fraction\_theta\_full Low ..... 0.971 Note  
[PLAT043\\_ALERT\\_1\\_C](#) Calculated and Reported Mol. Weight Differ by .. 1.01 Check  
[PLAT068\\_ALERT\\_1\\_C](#) Reported F000 Differs from Calcd (or Missing)... Please Check  
[PLAT230\\_ALERT\\_2\\_C](#) Hirshfeld Test Diff for N1 -- C28 .. 6.5 s.u.  
[PLAT911\\_ALERT\\_3\\_C](#) Missing # FCF Refl Between THmin & STh/L= 0.599 127 Report

---

### ● Alert level G

[PLAT005\\_ALERT\\_5\\_G](#) No Embedded Refinement Details found in the CIF Please Do !  
[PLAT066\\_ALERT\\_1\\_G](#) Predicted and Reported Tmin&Tmax Range Identical ? Check  
[PLAT093\\_ALERT\\_1\\_G](#) No s.u.'s on H-positions, Refinement Reported as mixed Check  
[PLAT899\\_ALERT\\_4\\_G](#) SHELXL97 is Deprecated and Succeeded by SHELXL 2014 Note  
[PLAT909\\_ALERT\\_3\\_G](#) Percentage of Observed Data at Theta(Max) Still 39 %

---

- 0 **ALERT level A** = Most likely a serious problem - resolve or explain
- 0 **ALERT level B** = A potentially serious problem, consider carefully
- 6 **ALERT level C** = Check. Ensure it is not caused by an omission or oversight
- 5 **ALERT level G** = General information/check it is not something unexpected

- 5 ALERT type 1 CIF construction/syntax error, inconsistent or missing data
  - 1 ALERT type 2 Indicator that the structure model may be wrong or deficient
  - 3 ALERT type 3 Indicator that the structure quality may be low
  - 1 ALERT type 4 Improvement, methodology, query or suggestion
  - 1 ALERT type 5 Informative message, check
- 
- 

It is advisable to attempt to resolve as many as possible of the alerts in all categories. Often the minor alerts point to easily fixed oversights, errors and omissions in your CIF or refinement strategy, so attention to these fine details can be worthwhile. In order to resolve some of the more serious problems it may be necessary to carry out additional measurements or structure refinements. However, the purpose of your study may justify the reported deviations and the more serious of these should normally be commented upon in the discussion or experimental section of a paper or in the "special\_details" fields of the CIF. checkCIF was carefully designed to identify outliers and unusual parameters, but every test has its limitations and alerts that are not important in a particular case may appear. Conversely, the absence of alerts does not guarantee there are no aspects of the results needing attention. It is up to the individual to critically assess their own results and, if

necessary, seek expert advice.

### Publication of your CIF in IUCr journals

A basic structural check has been run on your CIF. These basic checks will be run on all CIFs submitted for publication in IUCr journals (*Acta Crystallographica*, *Journal of Applied Crystallography*, *Journal of Synchrotron Radiation*); however, if you intend to submit to *Acta Crystallographica Section C* or *E*, you should make sure that [full publication checks](#) are run on the final version of your CIF prior to submission.

### Publication of your CIF in other journals

Please refer to the *Notes for Authors* of the relevant journal for any special instructions relating to CIF submission.

---

PLATON version of 19/11/2015; check.def file version of 17/11/2015

## Datablock j11 - ellipsoid plot

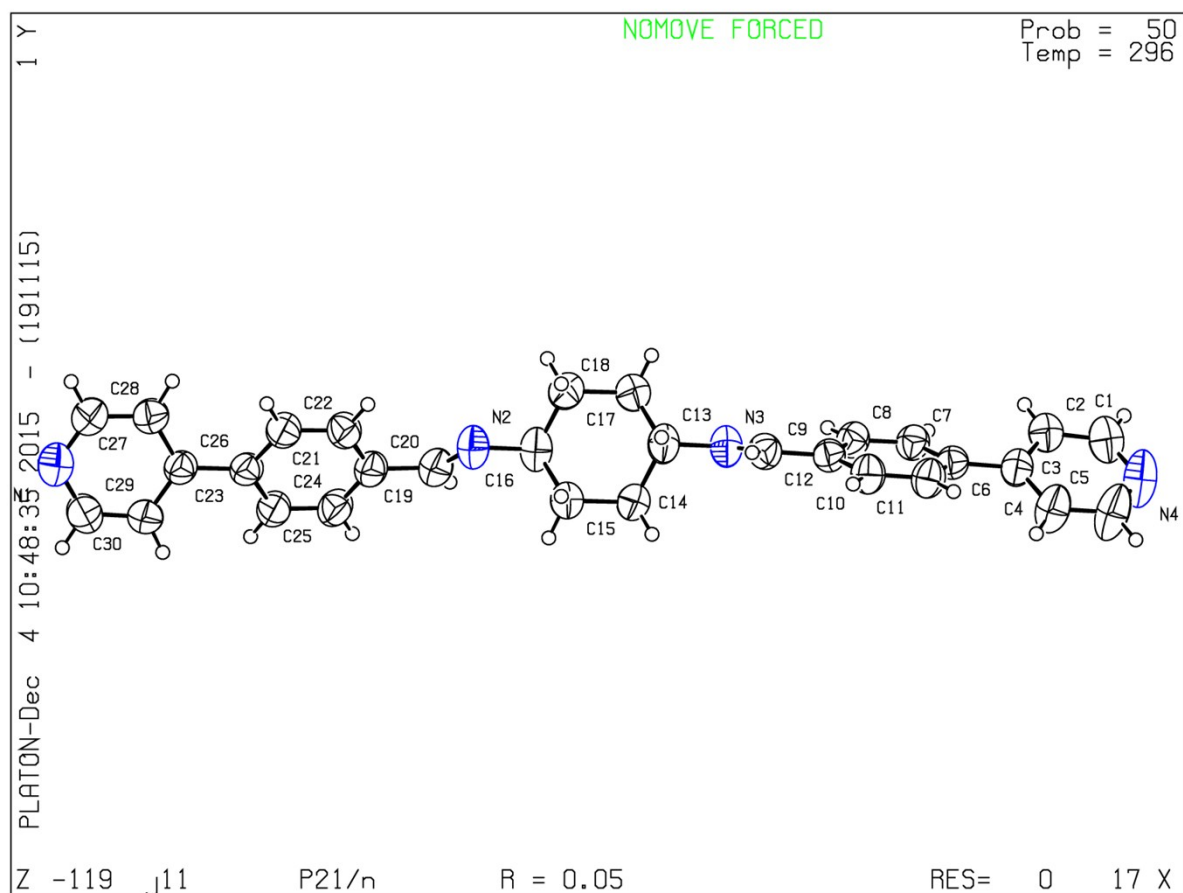

---

[Download CIF editor \(pubCIF\) from the IUCr](#)

[Download CIF editor \(enCIFer\) from the CCDC](#)

[Test a new CIF entry](#)



## checkCIF (basic structural check) running

---

## checkCIF/PLATON (basic structural check)

---

Structure factors have been supplied for datablock(s) 1\_CHCl3

THIS REPORT IS FOR GUIDANCE ONLY. IF USED AS PART OF A REVIEW PROCEDURE FOR PUBLICATION, IT SHOULD NOT REPLACE THE EXPERTISE OF AN EXPERIENCED CRYSTALLOGRAPHIC REFEREE.

No syntax errors found.

Please wait while processing ....

[Structure factor report](#)

[CIF dictionary](#)

[Interpreting this report](#)

### Datablock: 1\_CHCl3

---

Bond precision: C-C = 0.0108 Å Wavelength=1.54178

Cell: a=19.7541 (13) b=7.1001 (5) c=28.463 (2)

alpha=90 beta=108.329 (4) gamma=90

Temperature: 100 K

|                                     | Calculated                   | Reported             |
|-------------------------------------|------------------------------|----------------------|
| Volume                              | 3789.6 (5)                   | 3789.6 (5)           |
| Space group                         | C 2/c                        | C2/c                 |
| Hall group                          | -C 2yc                       | ?                    |
| Moiety formula                      | C30 H28 I2 N4 Zn, 2(C H Cl3) | ?                    |
| Sum formula                         | C32 H30 Cl6 I2 N4 Zn         | C32 H30 Cl6 I2 N4 Zn |
| Mr                                  | 1002.49                      | 1002.47              |
| D <sub>x</sub> , g cm <sup>-3</sup> | 1.757                        | 1.757                |
| Z                                   | 4                            | 4                    |
| Mu (mm <sup>-1</sup> )              | 17.809                       | 17.809               |
| F000                                | 1952.0                       | 1952.0               |
| F000'                               | 1955.98                      |                      |
| h, k, l <sub>max</sub>              | 23, 8, 33                    | 23, 8, 33            |
| N <sub>ref</sub>                    | 3343                         | 3271                 |
| T <sub>min</sub> , T <sub>max</sub> | 0.472, 0.490                 | 0.470, 0.536         |

Tmin' 0.357

Correction method= # Reported T Limits: Tmin=0.470  
Tmax=0.536 AbsCorr = MULTI-SCAN

Data completeness= 0.978 Theta(max)= 66.310

R(reflections)= 0.0509( 2975) wR2(reflections)= 0.1268( 3271)

S = 1.160 Npar= 204

---

The following ALERTS were generated. Each ALERT has the format

**test-name\_ALERT\_alert-type\_alert-level.**

Click on the hyperlinks for more details of the test.

---

### Alert level C

[ABSTY02\\_ALERT\\_1\\_C](#) An `_exptl_absorpt_correction_type` has been given without a literature citation. This should be contained in the `_exptl_absorpt_process_details` field.

Absorption correction given as Multi-scan

[PLAT029\\_ALERT\\_3\\_C](#) `_diffn_measured_fraction_theta_full` Low ..... 0.978 Note

[PLAT342\\_ALERT\\_3\\_C](#) Low Bond Precision on C-C Bonds ..... 0.0108 Ang.

[PLAT790\\_ALERT\\_4\\_C](#) Centre of Gravity not Within Unit Cell: Resd. # 1 Note

C30 H28 I2 N4 Zn

[PLAT906\\_ALERT\\_3\\_C](#) Large K value in the Analysis of Variance ..... 2.927 Check

[PLAT911\\_ALERT\\_3\\_C](#) Missing # FCF Refl Between THmin & STh/L= 0.594 72 Report

[PLAT934\\_ALERT\\_3\\_C](#) Number of (Iobs-Icalc)/SigmaW > 10 Outliers .... 1 Check

---

### Alert level G

[PLAT004\\_ALERT\\_5\\_G](#) Polymeric Structure Found with Maximum Dimension 1 Info

[PLAT005\\_ALERT\\_5\\_G](#) No Embedded Refinement Details found in the CIF Please Do !

[PLAT083\\_ALERT\\_2\\_G](#) SHELXL Second Parameter in WGHT Unusually Large 51.36 Why ?

[PLAT093\\_ALERT\\_1\\_G](#) No s.u.'s on H-positions, Refinement Reported as mixed Check

[PLAT899\\_ALERT\\_4\\_G](#) SHELXL97 is Deprecated and Succeeded by SHELXL 2014 Note

[PLAT909\\_ALERT\\_3\\_G](#) Percentage of Observed Data at Theta(Max) Still 85 %

[PLAT910\\_ALERT\\_3\\_G](#) Missing # of FCF Reflection(s) Below Th(Min) ... 1 Report

---

0 **ALERT level A** = Most likely a serious problem - resolve or explain

0 **ALERT level B** = A potentially serious problem, consider carefully

7 **ALERT level C** = Check. Ensure it is not caused by an omission or oversight

7 **ALERT level G** = General information/check it is not something unexpected

2 ALERT type 1 CIF construction/syntax error, inconsistent or missing data

1 ALERT type 2 Indicator that the structure model may be wrong or deficient

7 ALERT type 3 Indicator that the structure quality may be low

2 ALERT type 4 Improvement, methodology, query or suggestion

2 ALERT type 5 Informative message, check

---

It is advisable to attempt to resolve as many as possible of the alerts in all categories. Often the minor alerts point to easily fixed oversights, errors and omissions in your CIF or refinement strategy, so attention to these fine details can be worthwhile. In order to resolve some of the more serious problems it may be necessary to carry out additional measurements or structure refinements. However, the purpose of your study may justify the reported deviations and the more serious of these should normally be commented upon in the discussion or experimental section of a paper or in the "special\_details" fields of the CIF. checkCIF was carefully

designed to identify outliers and unusual parameters, but every test has its limitations and alerts that are not important in a particular case may appear. Conversely, the absence of alerts does not guarantee there are no aspects of the results needing attention. It is up to the individual to critically assess their own results and, if necessary, seek expert advice.

### Publication of your CIF in IUCr journals

A basic structural check has been run on your CIF. These basic checks will be run on all CIFs submitted for publication in IUCr journals (*Acta Crystallographica*, *Journal of Applied Crystallography*, *Journal of Synchrotron Radiation*); however, if you intend to submit to *Acta Crystallographica Section C* or *E*, you should make sure that [full publication checks](#) are run on the final version of your CIF prior to submission.

### Publication of your CIF in other journals

Please refer to the *Notes for Authors* of the relevant journal for any special instructions relating to CIF submission.

---

PLATON version of 19/11/2015; check.def file version of 17/11/2015

## Datablock 1\_CHCl3 - ellipsoid plot

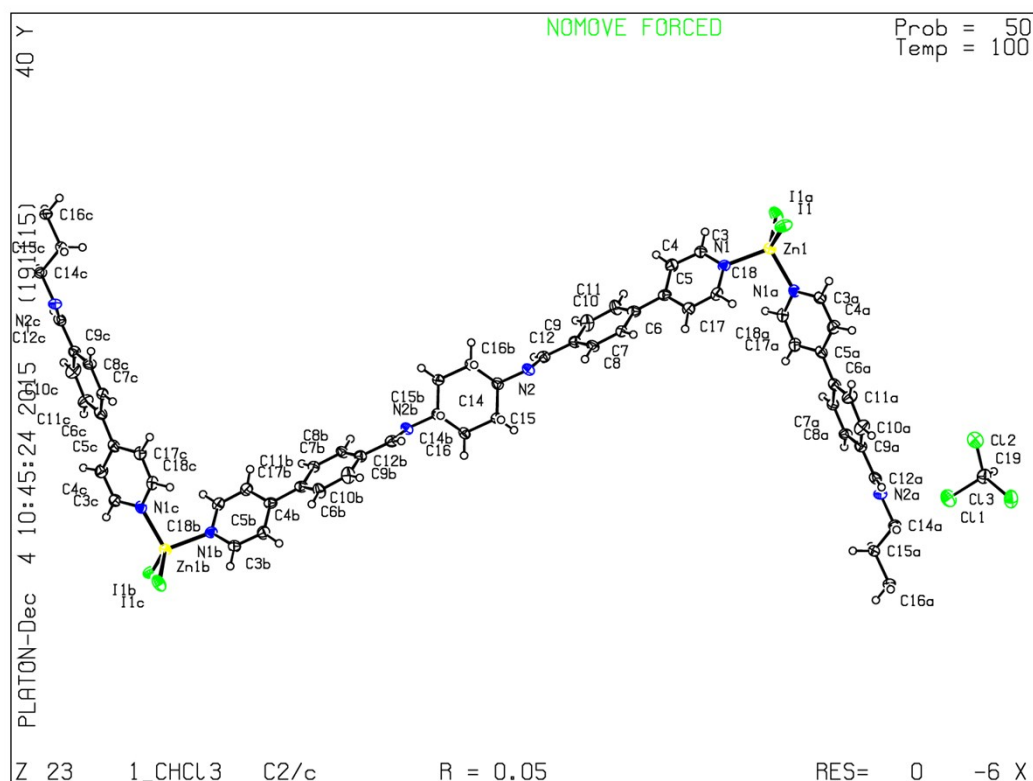

---

### Comments about the Absorbtion in 1·CHCl<sub>3</sub>.

SADABS-2008/1 - Bruker AXS area detector scaling and absorption correction was used.  $R(\text{int})$  was 0.0939 before and 0.0574 after correction. The Ratio of minimum to maximum transmission is 0.7659. The  $\lambda/2$  correction factor is 0.0015.
